# Supplementary material
Source: PubMed Central journal article supplement (PMC5711384)
Supplement: en.2017-00618.sf1.pdf [file en.2017-00618.sf1.pdf]

## Supplemental Figure 1

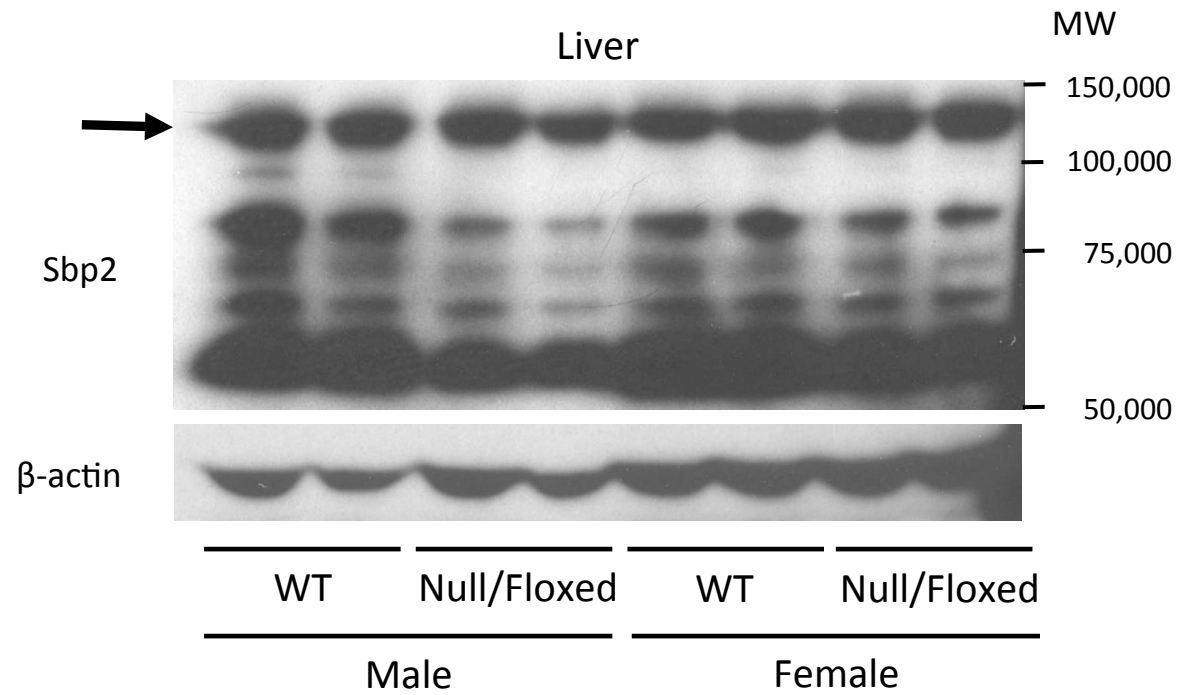

Western blot for Sbp2 in liver of P21 *Wt* and compound heterozygous *Null/Floxed* mice without tamoxifen injection, the full length Sbp2 isoform is indicated by arrow.

## Supplemental Figure 2

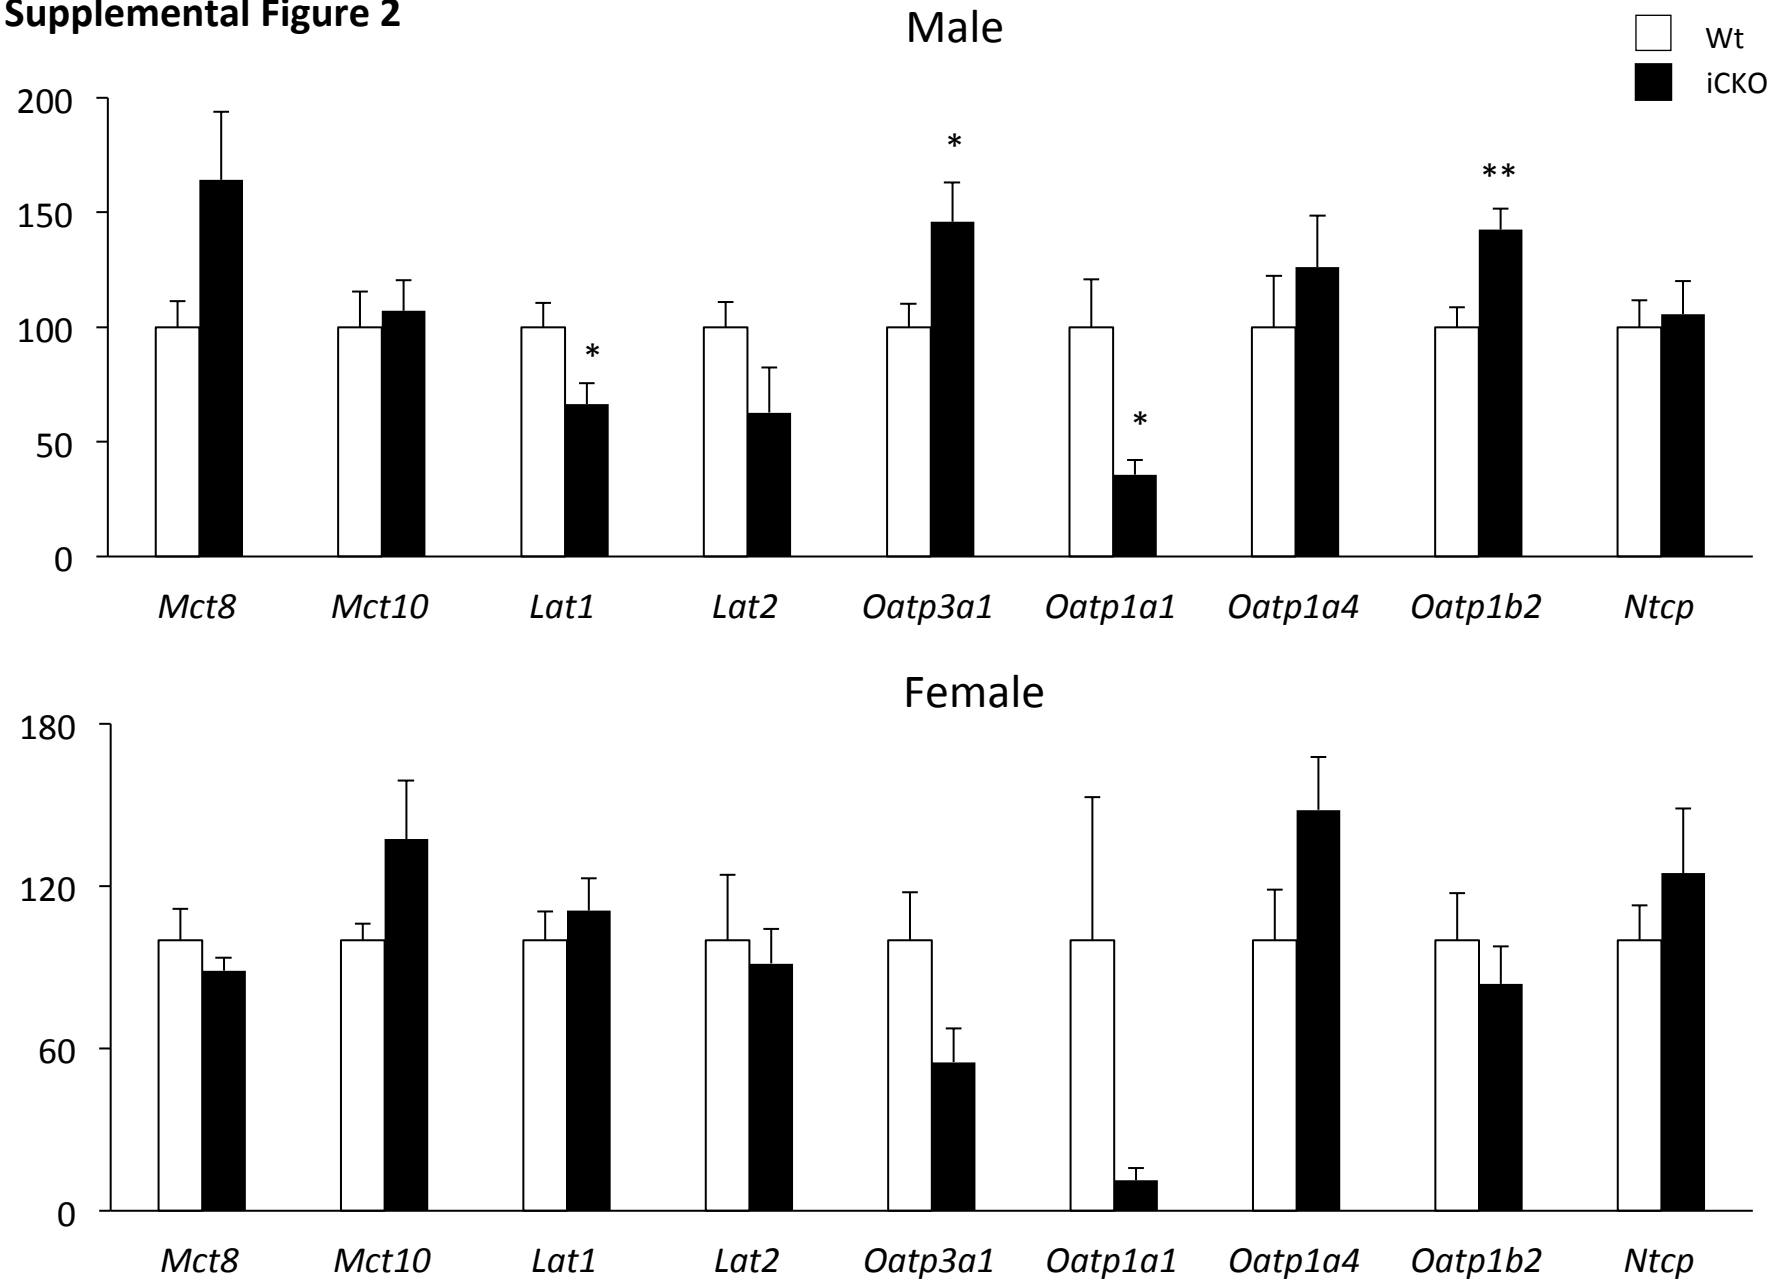

Expression of TH transporters in liver of *Shp2* iCKO vs *Wt* mice \*,  $P < 0.05$ ; \*\*,  $P < 0.01$ , 10 mice were studied in each group.
